# Supplementary material for: A Moderate Decrease in ADAMTS13 Activity Correlates with the Severity of STEC-HUS
Source: MDPI journal article supplement (doi:10.3390/biom13111671), 2023-11-20
Supplement: s1 [file s1]

Table S1. The standard of the classification of the severity of the disease.

| Characteristics                                                                             | Severity of the course of the STEC-HUS |                  |                    |
|---------------------------------------------------------------------------------------------|----------------------------------------|------------------|--------------------|
|                                                                                             | moderate condition                     | severe condition | critical condition |
| triad of TMA<br>(MAGA,<br>thrombocytopenia,<br>AKI)                                         | +                                      | +                | +                  |
| damage to the central<br>nervous system<br>(convulsive<br>syndrome, sopor,<br>stage I coma) | -                                      | +                | -                  |
| damage to the central<br>nervous system (stage<br>II-III coma)                              | -                                      | -                | +                  |
| respiratory and<br>cardiotonic support                                                      | -                                      | -                | +                  |
